# Supplementary material for: 3D PCL/Gelatin/Genipin Nanofiber Sponge as Scaffold for Regenerative Medicine
Source: MDPI journal article supplement (doi:10.3390/ma14082006), 2021-04-16
Supplement: s1 [file s1]

## **Supplementary Information for**

### **3D PCL/Gelatin/Genipin Nanofiber Sponge as Scaffold for Regenerative Medicine**

Markus Merk<sup>1,2</sup>, Orlando Chirikian<sup>2</sup> and Christian Adlhart<sup>1\*</sup>

<sup>1</sup>Institute of Chemistry and Biotechnology, Zurich University of Applied Sciences  
ZHAW, 8820 Wädenswil, Switzerland. <sup>2</sup>Biomolecular Science and Engineering,  
University of California Santa Barbara UCSB, Santa Barbara, CA 93106, USA.

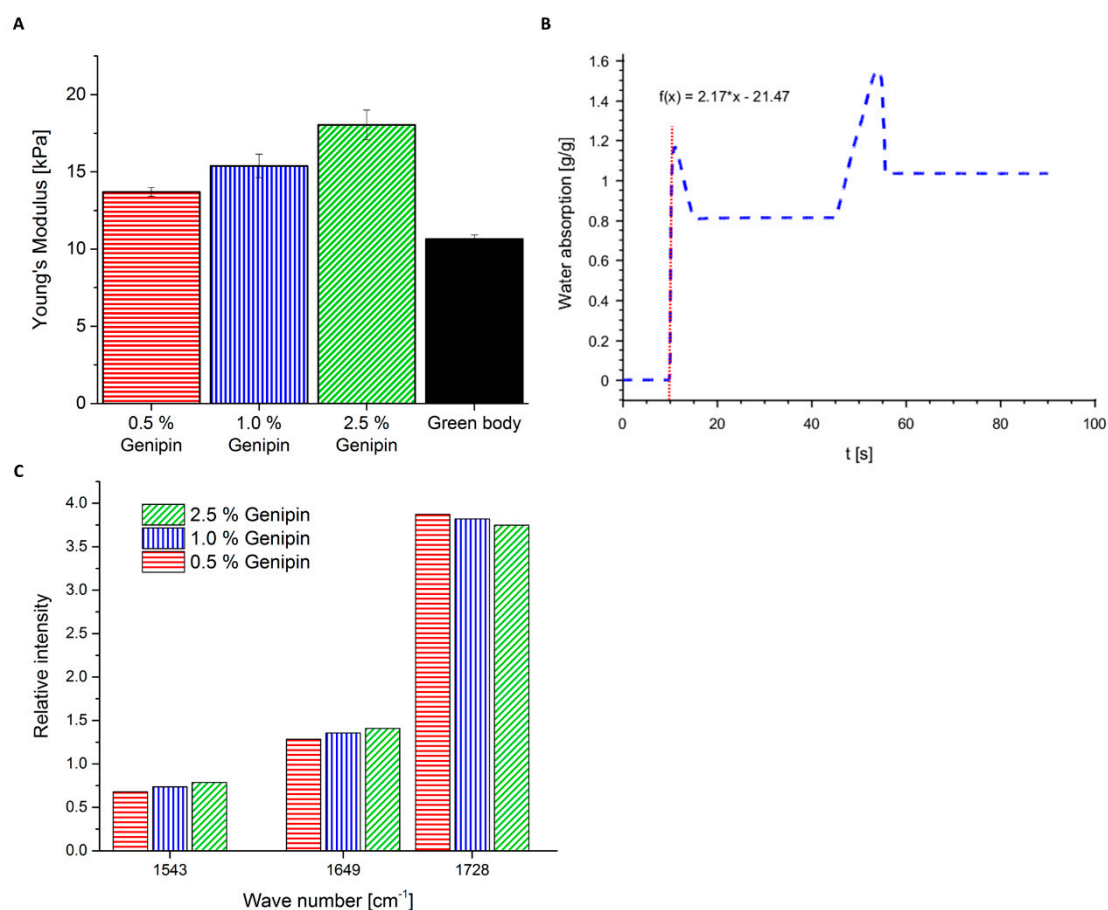

Figure S1: Characterization of different 3D scaffolds. (A) Young's moduli of 3D PCL/gelatin scaffolds cross-linked with either 0.5 %, 1.0 % or 2.5 % genipin and before cross-linking (green body). (B) Representative plot of the water absorption analysis, showing a scaffold cross-linked with 1 % genipin. Red dotted line indicates the applied linear regression for the water absorption rate measurements. (C) FTIR quantification of the cross-linked scaffolds. Wave number 1543 cm<sup>-1</sup> and 1649 cm<sup>-1</sup> correspond to the amide I and II bonds, respectively, and wave number 1728 cm<sup>-1</sup> corresponds to an ester bond.

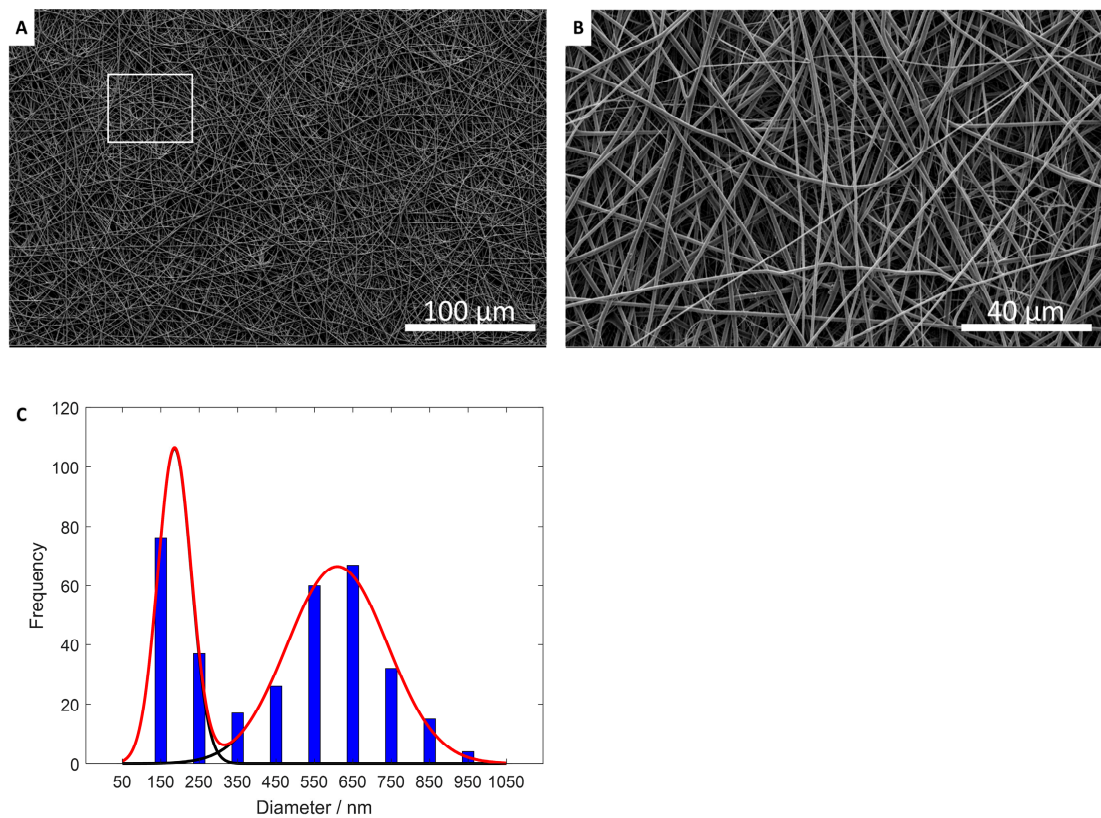

Figure S2: SEM image of electrospun 2D PCL/gelatin nanofiber mat (A) Composite fibers with a PCL to gelatin ratio of 2:1, scale bar = 100 μm. (B) Magnification of white insert in figure A, scale bar = 40 μm. (C) Fiber diameter distribution of electrospun nanofibers.

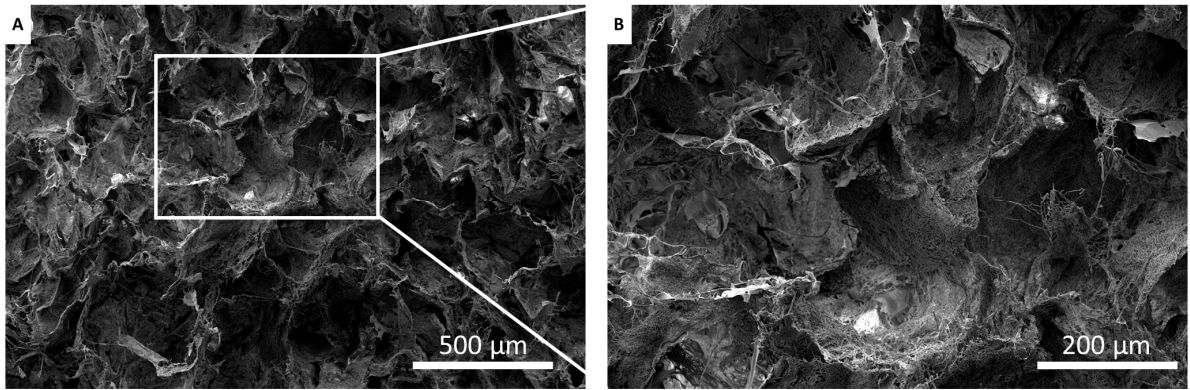

Figure S3: SEM image of 3D PCL/gelatin scaffolds. (A) Samples before cross-linking with genipin (green body), scale bar = 500  $\mu\text{m}$ . (B) Magnification of white insert in figure A, scale bar = 200  $\mu\text{m}$ .

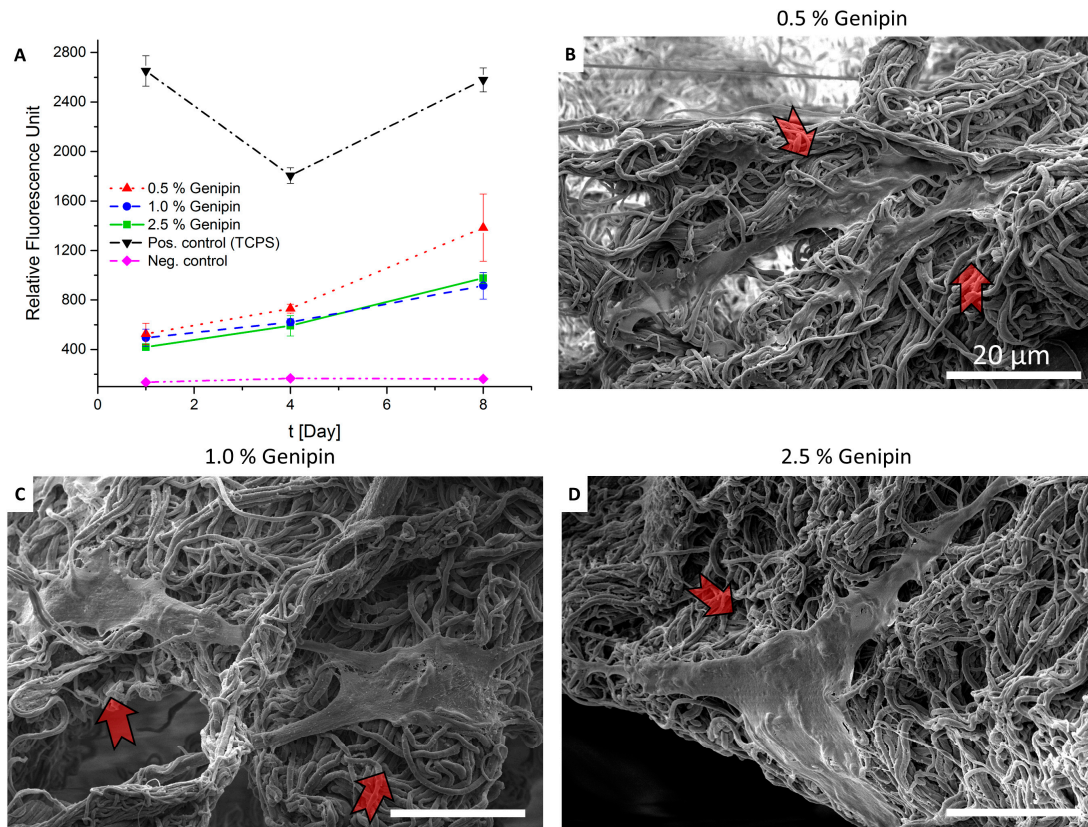

Figure S4: Short-term in vitro cell compatibility study using human dermal fibroblasts (HDF). (A) Metabolic activity measurements using the PrestoBlue assay. (B-D) SEM image of the cultured scaffolds after 8 days in culture. Red arrows indicate adhering and proliferating HDFs. (B) Scaffolds cross-linked with 0.5 % genipin. (C) Scaffolds cross-linked with 1.0 % genipin. (D) Scaffolds cross-linked with 2.5 % genipin. (B-D) Scale bar = 20  $\mu$ m.
